# Supplementary material
Source: PubMed Central journal article supplement (PMC3631612)

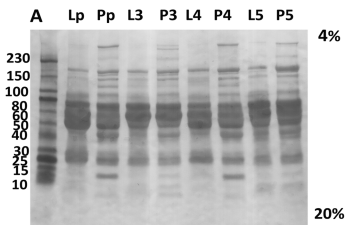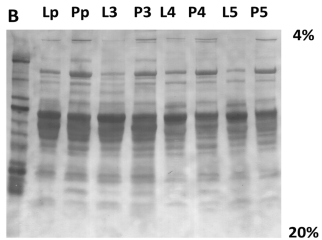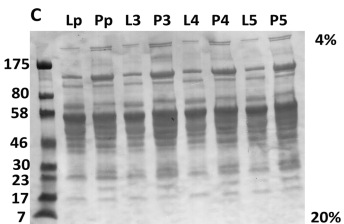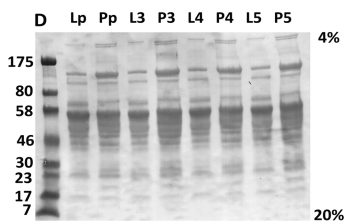

Supplement: NIHMS425964-supplement-02.pdf [file NIHMS425964-supplement-02.pdf]
